# Supplementary material for: Urinary Proteomic Signature in Acute Decompensated Heart Failure: Advances into Molecular Pathophysiology
Source: MDPI journal article supplement (doi:10.3390/ijms23042344), 2022-02-20
Supplement: s1 [file s1]

## *Supplementary material*

### **Urinary proteomic signature in acute decompensated heart failure: advances into molecular pathophysiology**

Elisa Diaz-Riera<sup>1,2</sup>; Maisa García-Arguinzonis<sup>1</sup>, Laura López<sup>3</sup>, Xavier Garcia-Moll<sup>3,4</sup>,  
Lina Badimon L<sup>1,4,5#</sup>, Padro T<sup>1,4#\*</sup>

1 Cardiovascular-Program ICCC; Research Institute – Hospital Santa Creu i Sant Pau, IIB-Sant Pau, 08041 Barcelona, Spain; ediazr@santpau.cat (ED-R); mgarciaar@santpau.cat (MG-A); lbadimon@santpau.cat (LB); tpadro@santpau.cat (TP)

2 Faculty of Medicine, Universitat de Barcelona, 08036 Barcelona, Spain

3 Cardiology department, Hospital Santa Creu i Sant Pau, 08025 Barcelona, Spain; llopezl@santpau.cat (LL); xgarcia-moll@santpau.cat (XG-M)

4 Centro de Investigación Biomédica en Red Cardiovascular (CIBERCV) Instituto de Salud Carlos III, 28029 Madrid, Spain

5 Cardiovascular Research Chair, UAB, 08025 Barcelona, Spain

# *Equal contribution*

#### **\*Correspondence:**

Dr Teresa Padro

tpadro@santpau.cat

Tel.: +34935565886;

Fax: +34-935565559

**Supplementary Table S1:** Clinical characteristics and risk factors of all patients.

|                                              | All patients<br>N=67 | NRF<br>N=35      | RD<br>N=32          | P-value          |
|----------------------------------------------|----------------------|------------------|---------------------|------------------|
| <b>DEMOGRAPHIC CHARACTERISTICS</b>           |                      |                  |                     |                  |
| Female/male, n                               | 22/45                | 10/25            | 12/20               | 0.603            |
| Age, years                                   | 71.0 [65.0-77.0]     | 69.0 [58.0-75.0] | 74.0 [69.5-77.5]    | <b>0.008</b>     |
| Weight, kg                                   | 73.0 [61.6-86.8]     | 70 [61.2-86.6]   | 77.2 [62.0-88.6]    | 0.543            |
| <b>KIDNEY FUNCTION MARKERS</b>               |                      |                  |                     |                  |
| Creatinine, $\mu\text{mol/L}$                | 105.0 [78.0-147.0]   | 78.0 [67.0-97.0] | 147.0 [122.5-194.0] | <b>&lt;0.001</b> |
| Glomerular filtration (MDRD-4) <sup>a</sup>  | 61.0 [40.9-83.3]     | 83.0 [68.9-99.0] | 39.7 [31.3-45.0]    | <b>&lt;0.001</b> |
| Urea, mmol/L                                 | 10.2 [6.8-16.1]      | 7.0 [5.8-9.2]    | 16.5 [13.0-22.9]    | <b>&lt;0.001</b> |
| <b>CARDIAC FUNCTION MARKERS</b>              |                      |                  |                     |                  |
| NT-proBNP, ng/L                              | 4.0 [2.3-8.6]        | 3.2 [1.9-6.4]    | 4.5 [2.8-14.7]      | <b>0.026</b>     |
| Left ventricular ejection fraction (LVEF), % | 45.0 [33.0-58.0]     | 38.0 [33.0-57.0] | 51.0 [35.5-59.5]    | 0.225            |
| Preserved LVEF, N (%)                        | 28 (42)              | 11 (31)          | 17 (53)             | 0.125            |
| Reduced LVEF, N (%)                          | 27 (40)              | 18 (52)          | 9 (28)              |                  |
| Mid-range LVEF, N (%)                        | 12 (18)              | 6 (17)           | 6 (19)              |                  |
| Atrial fibrillation, N (%)                   | 32 (48)              | 16 (47)          | 16 (50)             | >0.999           |
| Cardiovascular disease, N (%)                | 23 (34)              | 11 (31)          | 12 (38)             | 0.618            |
| <b>OTHER BIOCHEMICAL MARKERS</b>             |                      |                  |                     |                  |
| Haemoglobin, g/L                             | 122 [101-138]        | 128 [114-142]    | 110 [95-124]        | <b>0.004</b>     |
| <b>RISK FACTORS; N (%)</b>                   |                      |                  |                     |                  |
| Active smoking                               | 10 (15)              | 8 (23)           | 2 (6)               | 0.086            |
| Hypertension                                 | 49 (74)              | 21 (62)          | 28 (88)             | <b>0.024</b>     |
| Pulmonary hypertension                       | 16 (24)              | 8 (23)           | 8 (25)              | >0.999           |
| Diabetes mellitus type 2                     | 30 (45)              | 11 (32)          | 19 (59)             | <b>0.047</b>     |
| Dyslipidaemia                                | 46 (70)              | 20 (59)          | 26 (81)             | 0.063            |
| <b>BACKGROUND MEDICATION; N (%)</b>          |                      |                  |                     |                  |
| Diuretics                                    | 49 (73)              | 21 (60)          | 28 (88)             | <b>0.014</b>     |
| Statins                                      | 43 (64)              | 18 (51)          | 25 (78)             | <b>0.040</b>     |
| Anticoagulants                               | 27 (40)              | 14 (40)          | 13 (41)             | >0.999           |
| Antiplatelet agents                          | 38 (57)              | 19 (54)          | 19 (59)             | 0.806            |
| Beta-blockers                                | 46 (69)              | 21 (60)          | 25 (78)             | 0.124            |
| Antiarrhythmic agents                        | 7 (10)               | 4 (11)           | 3 (9)               | >0.999           |
| Antidiabetics                                | 27 (40)              | 8 (26)           | 19 (59)             | <b>0.003</b>     |
| Insulin                                      | 12 (18)              | 2 (6)            | 10 (31)             | <b>0.010</b>     |
| Oral antidiabetic agents                     | 22 (33)              | 8 (23)           | 14 (44)             | 0.117            |
| ACE inhibitor/ARB                            | 43 (66)              | 26 (74)          | 17 (57)             | 0.189            |

<sup>a</sup>MDRD-4 levels expressed in mL/min/1.73m<sup>2</sup>; Quantitative values were given in median [Q1-Q3]. P values of categorical variables were calculated with Fisher exact test, except for LVEF where  $\chi^2$  was used. P values of numerical data were calculated with Mann-Whitney, except for LVEF where Kruskal-Wallis was used. Diuretics: hydrochlorothiazide, furosemide, eplerenone, and spironolactone. Statins: atorvastatin, pravastatin, simvastatin, ezetimibe. Anticoagulants: warfarin, acenocumarol, bemiparin, heparin, dabigatran, rivaroxaban, edoxaban, and apixaban. Antiplatelet agents: acetylsalicylic acid and clopidogrel. Beta-blockers: bisoprolol and carvedilol. Antiarrhythmic agents: amiodarone. Oral antidiabetic agents: metformin and repaglinide. Angiotensin-converting enzyme inhibitors (ACEI) include: captopril, enalapril, and ramipril. Angiotensin receptor blockers (ARB): losartan, olmesartan, and valsartan.

**Supplementary Table S2:** Clinical characteristics and risk factors of discovery phase patients.

|                                              | 2DE-MS group<br>N=17 | All patients<br>N=67 | P value |
|----------------------------------------------|----------------------|----------------------|---------|
| DEMOGRAPHIC CHARACTERISTICS                  |                      |                      |         |
| Female/male, n                               | 3/14                 | 22/45                | 0.565   |
| Age, years                                   | 72 [69-76]           | 71 [65-77]           | 0.624   |
| Weight, kg                                   | 76 [66-87]           | 73 [62-89]           | 0.583   |
| KIDNEY FUNCTION MARKERS                      |                      |                      |         |
| Creatinine, μmol/L                           | 101 [73-131]         | 105.0 [78.0-147.0]   | 0.693   |
| Glomerular filtration (MDRD-4) <sup>a</sup>  | 68 [43.2-81.7]       | 61.0 [40.9-83.3]     | 0.476   |
| Urea, mmol/L                                 | 9.0 [5.8-13.1]       | 10.2 [6.8-16.1]      | 0.367   |
| CARDIAC FUNCTION MARKERS                     |                      |                      |         |
| NT-proBNP, μg/L                              | 2.4 [1.7-4.6]        | 4.0 [2.3-8.6]        | 0.160   |
| Left ventricular ejection fraction (LVEF), % | 48 [33-56]           | 45 [33-58]           | 0.738   |
| Preserved LVEF >50%, N (%)                   | 8 (47)               | 28 (42)              | 0.916   |
| Mildly reduced LVEF 40-49%, N (%)            | 3 (18)               | 12 (18)              |         |
| Reduced LVEF <40%, N (%)                     | 6 (35)               | 27 (40)              |         |
| OTHER BIOCHEMICAL MARKERS                    |                      |                      |         |
| Haemoglobin, g/L                             | 122 [106-139]        | 122 [101-138]        | 0.889   |
| MEDICAL HISTORY; N (%)                       |                      |                      |         |
| Atrial fibrillation                          | 12 (71)              | 32 (48)              | 0.283   |
| Cardiovascular disease                       | 4 (24)               | 23 (34)              | 0.563   |
| Active smoking                               | 3 (5)                | 10 (15)              | 0.721   |
| Hypertension                                 | 12 (71)              | 49 (74)              | >0.999  |
| Pulmonary hypertension                       | 6 (35)               | 16 (24)              | 0.364   |
| Diabetes mellitus type 2                     | 6 (35)               | 30 (45)              | 0.586   |
| Dyslipidaemia                                | 11 (65)              | 46 (70)              | >0.999  |
| BACKGROUND MEDICATION; N (%)                 |                      |                      |         |
| Diuretics                                    | 11 (65)              | 49 (73)              | 0.253   |
| Statins                                      | 9 (53)               | 43 (64)              | 0.415   |
| Anticoagulants                               | 10 (59)              | 27 (40)              | 0.415   |
| Antiplatelet agents                          | 7 (41)               | 38 (57)              | 0.286   |
| Beta-blockers                                | 11 (65)              | 46 (69)              | 0.777   |
| Antiarrhythmic agents                        | 0 (0)                | 7 (10)               | 0.335   |
| Antidiabetics                                | 3 (24)               | 27 (40)              | 0.265   |
| ACE inhibitor/ARB                            | 13 (76)              | 43 (66)              | 0.562   |

<sup>a</sup>MDRD-4 levels expressed in mL/min/1.73m<sup>2</sup>; Quantitative values were given in median [Q1-Q3]; 2DE-MS group refers to a subgroup of patients used for discovery phase of 2D electrophoresis coupled with mass spectrometry. P values of categorical were calculated with Fisher exact test, except for LVEF where  $\chi^2$  was used. P values of numerical data were calculated with Mann-Whitney, except for LVEF where Kruskal-Wallis was used. Diuretics: hydrochlorothiazide, furosemide, eplerenone, and spironolactone. Statins: atorvastatin, pravastatin, simvastatin, ezetimibe. Anticoagulants: warfarin, acenocumarol, bemiparin, heparin, dabigatran, rivaroxaban, edoxaban, and apixaban. Antiplatelet agents: acetylsalicylic acid and clopidogrel. Beta-blockers: bisoprolol and carvedilol. Antiarrhythmic agents: amiodarone. Oral antidiabetic agents: metformin and repaglinide. Angiotensin-converting enzyme (ACE) inhibitors include: captopril, enalapril, and ramipril. Angiotensin receptor blockers (ARB): losartan, olmesartan, and valsartan.

**Supplementary Table S3:** Extended data from table 1 regarding mass spectrometry characteristics of identified proteins in urine of ADHF patients.

| Gel-ID | Protein name                                                          | Gene name       | Swiss Prot number | Theoretical pI | Experimental pI | Theoretical MW (KDa) | Experimental MW (KDa) | MS or MS/MS | MASCOT Score | Coverage |
|--------|-----------------------------------------------------------------------|-----------------|-------------------|----------------|-----------------|----------------------|-----------------------|-------------|--------------|----------|
| 1      | Lysosomal acid phosphatase                                            | <i>ACP2</i>     | P11117            | 5.80           | 5.80            | 46.7                 | 45.5                  | MS          | 63           | 7        |
| 2      | Pancreatic $\alpha$ -amylase                                          | <i>AMY2A</i>    | P04746            | 6.45           | 6.45            | 57.7                 | 51.6                  | MS/MS       | 61           | -        |
| 3      | Annexin A10                                                           | <i>ANXA10</i>   | Q9UJ72            | 5.13           | 5.20            | 37.3                 | 35.2                  | MS          | 60           | 19       |
| 4      | Arylsulphatase A                                                      | <i>ARSA</i>     | P15289            | 5.57           | 5.50            | 53.6                 | 49.6                  | MS          | 67           | 10       |
| 5      | Zinc- $\alpha$ -2-glycoprotein                                        | <i>AZGP1</i>    | P25311            | 5.58           | 4.8-5.1         | 34.3                 | 41.6-43.5             | MS          | 66           | 11       |
| 6      | Complement C3                                                         | <i>C3</i>       | P01024            | 6.00           | 6.75            | 187.1                | 54.8                  | MS          | 62           | 3        |
| 7      | Carbonic anhydrase 1                                                  | <i>CA1</i>      | P00915            | 6.63           | 6.70            | 28.9                 | 30.1                  | MS/MS       | 71           | -        |
| 8      | Endosialin                                                            | <i>CD248</i>    | Q9HCU0            | 5.14           | 4.70            | 80.9                 | 44.6-45.6             | MS/MS       | 54           | -        |
| 9      | CD59 glycoprotein                                                     | <i>CD59</i>     | P13987            | 5.18           | 4.90            | 14.2                 | 22.7                  | MS/MS       | 82           | -        |
| 10     | Cathepsin D                                                           | <i>CTSD</i>     | P07339            | 5.60           | 5.40            | 44.6                 | 31.2                  | MS/MS       | 58           | -        |
| 11     | Fibrinogen $\beta$ -chain                                             | <i>FGB</i>      | P02675            | 7.95           | 4.90            | 55.9                 | 18.7-19.8             | MS/MS       | 55           | -        |
| 12     | Fibrinogen $\gamma$ -chain                                            | <i>FGG</i>      | P02679            | 5.24           | 5.30-5.35       | 55.5                 | 48.0-48.2             | MS/MS       | 55           | -        |
| 13     | Vitamin D binding protein                                             | <i>GC</i>       | P02774            | 5.22           | 5.20            | 52.9                 | 50.5                  | MS          | 94           | 17       |
| 14     | Hemopexin                                                             | <i>HPX</i>      | P02790            | 6.43           | 5.30-5.35       | 51.7                 | 55.4                  | MS/MS       | 70           | -        |
| 15     | Basement membrane-specific heparan sulphate proteoglycan core protein | <i>HSPG2</i>    | P98160            | 6.03           | 5.40            | 468.8                | 24.9                  | MS/MS       | 102          | -        |
| 16     | Inter- $\alpha$ -trypsin inhibitor heavy chain H4                     | <i>ITIH4</i>    | Q14624            | 6.00           | 4.9-5.1         | 103.4                | 36.6-37.2             | MS          | 74           | 10       |
| 17     | Kininogen-1                                                           | <i>KNG1</i>     | P01042            | 6.23           | 4.7-4.9         | 72.0                 | 50.5-53.3             | MS          | 63           | 8        |
| 18     | Vesicular integral-membrane protein VIP36                             | <i>LMAN2</i>    | Q12907            | 6.06           | 5.20            | 40.2                 | 35.2                  | MS/MS       | 60           | -        |
| 19     | Leucine-rich $\alpha$ -2-glycoprotein                                 | <i>LRG1</i>     | P02750            | 5.66           | 4.60            | 38.2                 | 47.4                  | MS/MS       | 79           | -        |
| 20     | Retinol binding protein 4                                             | <i>RBP4</i>     | P02753            | 5.27           | 5.20            | 23.0                 | 24.7-25.2             | MS/MS       | 66           | -        |
| 21     | $\alpha$ -1-antitrypsin                                               | <i>SERPINA1</i> | P01009            | 5.37           | 5.00-5.10       | 46.7                 | 51.4-52.2             | MS          | 130          | 19       |
| 22     | Antithrombin III                                                      | <i>SERPINC1</i> | P01008            | 5.95           | 5.20            | 52.6                 | 52.6                  | MS/MS       | 78           | -        |
| 23     | Serotransferrin                                                       | <i>TF</i>       | P02787            | 6.70           | 6.00-6.40       | 77.1                 | 56.5                  | MS          | 234          | 26       |
| 24     | Trefoil factor 2                                                      | <i>TFF2</i>     | Q03403            | 5.21           | 5.20            | 14.3                 | 11.1                  | MS/MS       | 83           | -        |
| 25     | Transthyretin                                                         | <i>TTR</i>      | P02766            | 5.31           | 5.30            | 15.9                 | 15.9                  | MS/MS       | 61           | -        |
| 26     | Vitellogenesis membrane outer layer protein 1 homolog                 | <i>VMO1</i>     | Q7Z5L0            | 4.65           | 4.65            | 21.2                 | 21.2                  | MS/MS       | 87           | -        |

pI: isoelectric point; MW: molecular weight; MS: mass spectrometry.

**Supplementary Table S4:** Selected peptide information of proteins identified by MS/MS in urine of ADHF patients.

| Gel-ID | Protein name                                                          | Gene name | Swiss Prot number | M/Z           | Position  | Sequence                | Modification     | Miss-cleavage |
|--------|-----------------------------------------------------------------------|-----------|-------------------|---------------|-----------|-------------------------|------------------|---------------|
| 2      | Pancreatic $\alpha$ -amylase                                          | AMY2A     | P04746            | <b>1427.7</b> | 307-318   | ALVFVDNHDNQR            | -                | 0             |
|        |                                                                       |           |                   | 1570.7        | 88-100    | SGNEDEFNMVTR            | MSO: 97          | 1             |
| 7      | Carbonic anhydrase 1                                                  | CA1       | P00915            | <b>985.4</b>  | 82-90     | GGPFSDSYR               | -                | 0             |
|        |                                                                       |           |                   | 970.6         | 161-169   | VLDALQAIK               | -                | 0             |
| 8      | Endosialin                                                            | CD248     | Q9HCU0            | <b>1198.6</b> | 93-101    | QCQLQRPLR               | Cys_CAM: 94      | 0             |
|        |                                                                       |           |                   | 1072.5        | 216-225   | QPEGGVGWSR              | -                | 0             |
| 9      | CD59 glycoprotein                                                     | CD59      | P13987            | <b>1539.7</b> | 67-78     | FEHCNFDVTTTR            | Cys_CAM: 70      | 0             |
| 10     | Cathepsin D                                                           | CTSD      | P07339            | <b>1462.7</b> | 393-403   | YYTVFDRDNNR             | -                | 1             |
| 11     | Fibrinogen $\beta$ -chain                                             | FGB       | P02675            | <b>1032.6</b> | 484-491   | IRPFFPQQ                | -                | 0             |
| 12     | Fibrinogen $\gamma$ -chain                                            | FGG       | P02679            | <b>1034.5</b> | 293-301   | VGPEADKYR               | -                | 1             |
|        |                                                                       |           |                   | 1194.5        | 32-40     | DNCCILDER               | Cys_CAM: 34, 35  | 0             |
|        |                                                                       |           |                   | 1545.8        | 418-432   | LTIGEGQQHHLGGA          | -                | 0             |
| 14     | Hemopexin                                                             | HPX       | P02790            | <b>1220.6</b> | 92-102    | NFSPVDAAFR              | -                | 0             |
|        |                                                                       |           |                   | 1268.7        | 209-219   | FDPVRGEVPPR             | -                | 1             |
|        |                                                                       |           |                   | 1684.9        | 209-222   | FDPVRGEVPPRYPR          | -                | 2             |
| 15     | Basement membrane-specific heparan sulphate proteoglycan core protein | HSPG2     | P98160            | 1666.8        | 4282-4295 | LVSEDPINDGEWHR          | -                | 0             |
|        |                                                                       |           |                   | <b>1601.9</b> | 4304-4318 | RGSIQVDGEELVSGR         | -                | 1             |
|        |                                                                       |           |                   | 2413.2        | 4358-4379 | NLVLHSARPGAPPPQPLDLQ HR | -                | 0             |
| 18     | Vesicular integral-membrane protein VIP36                             | LMAN2     | Q12907            | 1343.7        | 208-218   | NRDHDFTFLAVR            | -                | 1             |
|        |                                                                       |           |                   | <b>1073.5</b> | 210-218   | DHDFTFLAVR              | -                | 0             |
| 19     | Leucine-rich $\alpha$ -2-glycoprotein                                 | LRG1      | P02750            | 989.55        | 251-260   | VAAGAFQGLR              | -                | 0             |
|        |                                                                       |           |                   | <b>1152.6</b> | 165-175   | ALGHLDLSGNR             | -                | 0             |
| 20     | Retinol binding protein 4                                             | RBP4      | P02753            | <b>1106.5</b> | 29-37     | VKENFDKAR               | -                | 2             |
|        |                                                                       |           |                   | 1302.7        | 172-181   | QRQEELCLAR              | Cys_CAM: 178     | 1             |
|        |                                                                       |           |                   | 1675.8        | 185-198   | LIVHNGYCDGRSER          | Cys_CAM: 192     | 1             |
| 22     | Antithrombin III                                                      | SERPINC1  | P01008            | <b>1674.8</b> | 202-215   | LQPLDFKENAEQSR          | -                | 1             |
| 24     | Trefoil factor 2                                                      | TFF2      | Q03403            | <b>1696.7</b> | 90-104    | NCGYPGISPEECASR         | Cys_CAM: 91, 101 | 0             |
| 25     | Transthyretin                                                         | TTR       | P02766            | <b>1394.7</b> | 56-68     | AADDTWEPFASGK           | -                | 0             |
| 26     | Vitellogenin membrane outer layer protein 1 homolog                   | VMO1      | Q7Z5L0            | <b>1217.7</b> | 185-196   | GLGDDTALNDAR            | -                | 0             |

M/Z: mass to charge ratio peaks, in bold those with highest MASCOT scores; position of amino acids corresponding to each peak and its sequence; variable modifications accepted: carbamidomethyl (CAM) and methionine sulfoxide (MSO); miss-cleavage: up to two trypsin miss-cleavages accepted.

**Supplementary Table S5:** Biological processes and molecular functions of differential urinary proteins.

| SwissProt number | Gene            | Biological processes |                                 |                                | Molecular functions |         |                    |           |
|------------------|-----------------|----------------------|---------------------------------|--------------------------------|---------------------|---------|--------------------|-----------|
|                  |                 | Cell function        | Haemostatic & complement system | Inflammation & immune response | Metabolic processes | Binding | Catalytic activity | Transport |
| P11117           | <i>ACP2</i>     |                      |                                 |                                | •                   |         | •                  |           |
| P04746           | <i>AMY2A</i>    |                      |                                 |                                | •                   | •       | •                  |           |
| Q9UJ72           | <i>ANXA10</i>   |                      |                                 |                                | •                   | •       |                    |           |
| P15289           | <i>ARSA</i>     |                      |                                 |                                | •                   | •       |                    |           |
| P25311           | <i>AZGP1</i>    | •                    | •                               |                                |                     |         |                    | •         |
| P01024           | <i>C3</i>       |                      | •                               | •                              | •                   | •       | •                  |           |
| P00915           | <i>CA1</i>      |                      | •                               |                                |                     | •       | •                  |           |
| Q9HCU0           | <i>CD248</i>    | •                    |                                 |                                |                     | •       |                    |           |
| P13987           | <i>CD59</i>     |                      | •                               |                                |                     | •       |                    |           |
| P07339           | <i>CTSD</i>     |                      |                                 |                                | •                   |         | •                  |           |
| P02675           | <i>FGB</i>      | •                    | •                               | •                              |                     | •       |                    |           |
| P02679           | <i>FGG</i>      | •                    | •                               |                                |                     | •       |                    |           |
| P02774           | <i>GC</i>       |                      |                                 |                                | •                   | •       |                    | •         |
| P02790           | <i>HPX</i>      |                      |                                 |                                | •                   | •       |                    | •         |
| P98160           | <i>HSPG2</i>    | •                    |                                 | •                              | •                   | •       |                    |           |
| Q14624           | <i>ITIH4</i>    |                      |                                 | •                              |                     |         | •                  |           |
| P01042           | <i>KNG1</i>     |                      | •                               | •                              |                     | •       | •                  |           |
| Q12907           | <i>LMAN2</i>    |                      |                                 |                                | •                   | •       |                    | •         |
| P02750           | <i>LRG1</i>     | •                    |                                 | •                              |                     | •       |                    |           |
| P02753           | <i>RBP4</i>     |                      | •                               |                                | •                   | •       |                    | •         |
| P01009           | <i>SERPINA1</i> |                      | •                               | •                              |                     | •       | •                  |           |
| P01008           | <i>SERPINC1</i> |                      | •                               | •                              |                     | •       | •                  |           |
| P02787           | <i>TF</i>       |                      | •                               | •                              |                     | •       |                    | •         |
| Q03403           | <i>TFF2</i>     |                      | •                               |                                |                     | •       |                    |           |
| P02766           | <i>TTR</i>      |                      |                                 |                                | •                   | •       |                    | •         |
| Q7Z5L0           | <i>VMO1</i>     |                      |                                 |                                |                     | •       | •                  |           |

Cell function includes: angiogenesis, cell adhesion, differentiation, and migration.

**Supplementary table S6:** Urinary transthyretin levels in relation to patient clinical characteristics.

|                                  | ADHF patients |                 | NRF |                              | RD |                              |
|----------------------------------|---------------|-----------------|-----|------------------------------|----|------------------------------|
|                                  | N             | Median [IQR]    | N   | Median [IQR]                 | N  | Median [IQR]                 |
| <b>LVEF</b>                      |               |                 |     |                              |    |                              |
| Reduced (<40%)                   | 27            | 12.3 [3.3-64.1] | 18  | 12.3 [3.3-64.1] <sup>a</sup> | 9  | 12.0 [3.3-54.5] <sup>b</sup> |
| Mildly reduced (40-49%)          | 12            | 15.0 [4.8-71.1] | 6   | 9.7 [3.6-41.8]               | 6  | 19.6 [15.0-71.1]             |
| Preserved (≥50%)                 | 28            | 7.8 [3.7-64.4]  | 11  | 4.1 [1.6-5.0]                | 17 | 15.1 [7.2-70.7]              |
| <i>P value</i>                   |               | 0.653           |     | 0.126                        |    | 0.428                        |
| <b>Hypertension</b>              |               |                 |     |                              |    |                              |
| No                               | 17            | 3.9 [2.8-64.1]  | 13  | 3.6 [2.4-64.1]               | 4  | 5.0 [3.3-70.7]               |
| Yes                              | 49            | 15.0 [5.0-64.4] | 21  | 11.0 [4.2-43.0]              | 28 | 18.3 [7.6-71.1]              |
| <i>P value</i>                   |               | 0.144           |     | 0.433                        |    | 0.353                        |
| <b>Dyslipidaemia</b>             |               |                 |     |                              |    |                              |
| No                               | 20            | 5.3 [3.3-54.5]  | 13  | 4.6 [3.0-40.5]               | 6  | 10.3 [5.0-54.5]              |
| Yes                              | 46            | 15.1 [4.3-67.1] | 20  | 12.3 [2.2-44.2]              | 26 | 18.9 [7.6-72.3]              |
| <i>P value</i>                   |               | 0.205           |     | 0.685                        |    | 0.263                        |
| <b>Diabetes mellitus type II</b> |               |                 |     |                              |    |                              |
| No                               | 36            | 5.5 [3.3-44.2]  | 23  | 4.8 [3.3-41.8]               | 13 | 11.2 [5.0-54.5]              |
| Yes                              | 30            | 18.1 [7.6-71.1] | 11  | 15.2 [1.6-45.0]              | 19 | 19.6 [7.6-85.2]              |
| <i>P value</i>                   |               | 0.098           |     | 0.767                        |    | 0.160                        |
| <b>Cardiovascular disease</b>    |               |                 |     |                              |    |                              |
| No                               | 44            | 8.7 [3.4-43.4]  | 24  | 4.5 [2.4-35.1]               | 20 | 14.8 [5.0-64.4]              |
| Yes                              | 23            | 15.0 [5.3-97.3] | 11  | 12.1 [2.8-64.1]              | 12 | 41.1 [7.2-128.3]             |
| <i>P value</i>                   |               | 0.145           |     | 0.416                        |    | 0.270                        |
| <b>Atrial fibrillation</b>       |               |                 |     |                              |    |                              |
| No                               | 34            | 14.8 [4.8-64.4] | 18  | 9.6 [3.3-64.1]               | 16 | 15.1 [7.2-64.4]              |
| Yes                              | 32            | 8.7 [3.3-54.5]  | 16  | 4.3 [2.2-41.8]               | 16 | 24.2 [3.7-84.8]              |
| <i>P value</i>                   |               | 0.701           |     | 0.439                        |    | 0.800                        |
| <b>Pulmonary hypertension</b>    |               |                 |     |                              |    |                              |
| No                               | 51            | 11.2 [3.3-64.4] | 27  | 5.2 [2.4-44.2]               | 24 | 18.3 [7.6-70.7]              |
| Yes                              | 16            | 12.3 [3.7-54.5] | 8   | 8.2 [3.6-16.9]               | 8  | 15.0 [3.7-85.2]              |
| <i>P value</i>                   |               | 0.893           |     | 0.962                        |    | 0.811                        |

Urinary transthyretin levels in ng TTR/mg total protein. LVEF: left ventricular ejection fraction; NRF: ADHF patients with normal renal function at hospital admission; RD: ADHF patients with renal dysfunction at hospital admission; P values were calculated by Mann-Whitney test except for LVEF where Kruskal-Wallis test was used. Information of one patient was missing for hypertension, dyslipidaemia and diabetes mellitus type 2. <sup>a,b</sup>Comparison reduced vs preserved LVEF (Mann-Whitney), <sup>a</sup>P=0.049, <sup>b</sup>P=0.363.

**Supplementary table S7:** ROC (associated receiver operating characteristic) curve (AUC) analysis for determining power of urinary TTR and RBP4 levels in ADHF patients for GFR discrimination.

| Protein           | AUC Area | Lower limit | Upper limit | P-value |
|-------------------|----------|-------------|-------------|---------|
| TTR               | 0.633    | 0.489       | 0.776       | 0.070   |
| RBP4              | 0.742    | 0.614       | 0.870       | <0.001  |
| <b>TTR + RBP4</b> | 0.826    | 0.705       | 0.947       | <0.0001 |

TTR: transthyretin; RBP4: retinol binding protein 4, AUC: area under the curve.



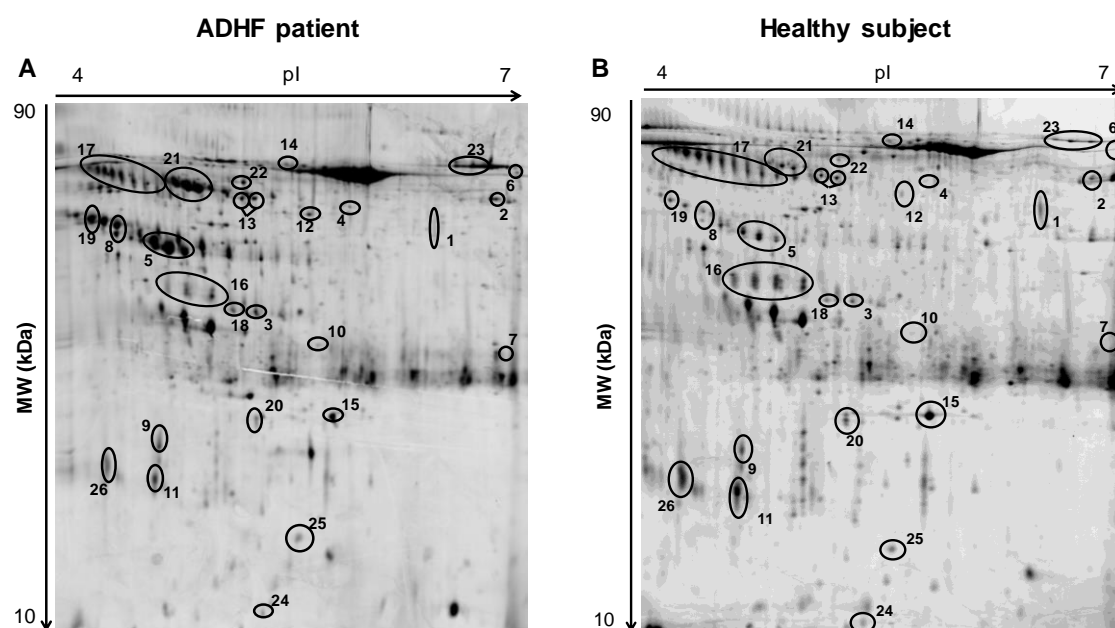

**Supplementary Figure S1.** 2DE-PAGE gels of urinary samples from a representative ADHF patient (A) and a representative healthy subject (B) in a pI range of 4-7 and 12% SDS-PAGE gels.

- |    |                               |    |                                                                       |
|----|-------------------------------|----|-----------------------------------------------------------------------|
| 1  | Lysosomal acid phosphatase    | 14 | Hemopexin                                                             |
| 2  | Pancreatic $\alpha$ -amylase  | 15 | Basement membrane-specific heparan sulphate proteoglycan core protein |
| 3  | Annexin A10                   | 16 | Inter- $\alpha$ -trypsin inhibitor heavy chain 4                      |
| 4  | Zinc $\alpha$ -2-glycoprotein | 17 | Kininogen 1                                                           |
| 5  | Arylsulphatase A              | 18 | Vesicular integral-membrane protein VIP36                             |
| 6  | Complement C3                 | 19 | Leucine-rich $\alpha$ -2-glycoprotein                                 |
| 7  | Carbonic anhydrase 1          | 20 | Retinol binding protein 4                                             |
| 8  | Endosialin                    | 21 | $\alpha$ -1-antitrypsin                                               |
| 9  | CD59 glycoprotein             | 22 | Antithrombin III                                                      |
| 10 | Cathepsin D                   | 23 | Serotransferrin                                                       |
| 11 | Fibrinogen $\beta$ -chain     | 24 | Trefoil factor 2                                                      |
| 12 | Fibrinogen $\gamma$ -chain    | 25 | Transthyretin                                                         |
| 13 | Vitamin D binding protein     | 26 | Vitelline membrane outer layer protein 1 homolog                      |

| Protein         | SwissProt number | Intensity change | MDRD-4 |    |    | LVEF |    |    |
|-----------------|------------------|------------------|--------|----|----|------|----|----|
|                 |                  |                  | T1     | T2 | T3 | T1   | T2 | T3 |
| <i>FGB</i>      | P02675           | down             |        |    |    |      |    |    |
| <i>LMAN2</i>    | Q12907           | down             |        |    |    |      |    |    |
| <i>ANXA10</i>   | Q9UJ72           | down             |        |    |    |      |    |    |
| <i>RBP4</i>     | P02753           | down             |        |    |    |      |    |    |
| <i>HPX</i>      | P02790           | up               |        |    |    |      |    |    |
| <i>TTR</i>      | P02766           | up               |        |    |    |      |    |    |
| <i>GC</i>       | P02774           | up               |        |    |    |      |    |    |
| <i>ACP2</i>     | P11117           | down             |        |    |    |      |    |    |
| <i>AMY2A</i>    | P04746           | down             |        |    |    |      |    |    |
| <i>VMO1</i>     | Q7Z5L0           | down             |        |    |    |      |    |    |
| <i>ITIH4</i>    | Q14624           | down             |        |    |    |      |    |    |
| <i>SERPINA1</i> | P01009           | up               |        |    |    |      |    |    |
| <i>KNG1</i>     | P01042           | down             |        |    |    |      |    |    |
| <i>FGG</i>      | P02679           | up               |        |    |    |      |    |    |
| <i>SERPINC1</i> | P01008           | up               |        |    |    |      |    |    |
| <i>AZGP1</i>    | P25311           | up               |        |    |    |      |    |    |
| <i>HSPG2</i>    | P98160           | down             |        |    |    |      |    |    |
| <i>CD59</i>     | P13987           | up               |        |    |    |      |    |    |
| <i>C3</i>       | P01024           | up               |        |    |    |      |    |    |
| <i>CTSD</i>     | P07339           | up               |        |    |    |      |    |    |
| <i>ARSA</i>     | P15289           | up               |        |    |    |      |    |    |
| <i>TF</i>       | P02787           | up               |        |    |    |      |    |    |
| <i>CD248</i>    | Q9HCU0           | up               |        |    |    |      |    |    |
| <i>LRG1</i>     | P02750           | up               |        |    |    |      |    |    |
| <i>TFF2</i>     | Q03403           | down             |        |    |    |      |    |    |
| <i>CA1</i>      | P00915           | up               |        |    |    |      |    |    |

  

|  | Fold change |
|--|-------------|
|  | 1.5-2.0     |
|  | 2.1-3.0     |
|  | 3.1-5.0     |
|  | >5.1        |

  

|    | MDRD-4             | LVEF             |
|----|--------------------|------------------|
| T1 | 33.7 [30.7-43.2]   | 33.0 [22.0-33.0] |
| T2 | 68.5 [62.5-71.7]   | 49.5 [47.0-55.0] |
| T3 | 97.8 [106.0-120.0] | 60.0 [60.0-65.0] |

**Supplementary Figure S2.** Fold change in urinary differential proteins according to renal function and left ventricular ejection fraction (LVEF) distributed by tertiles.

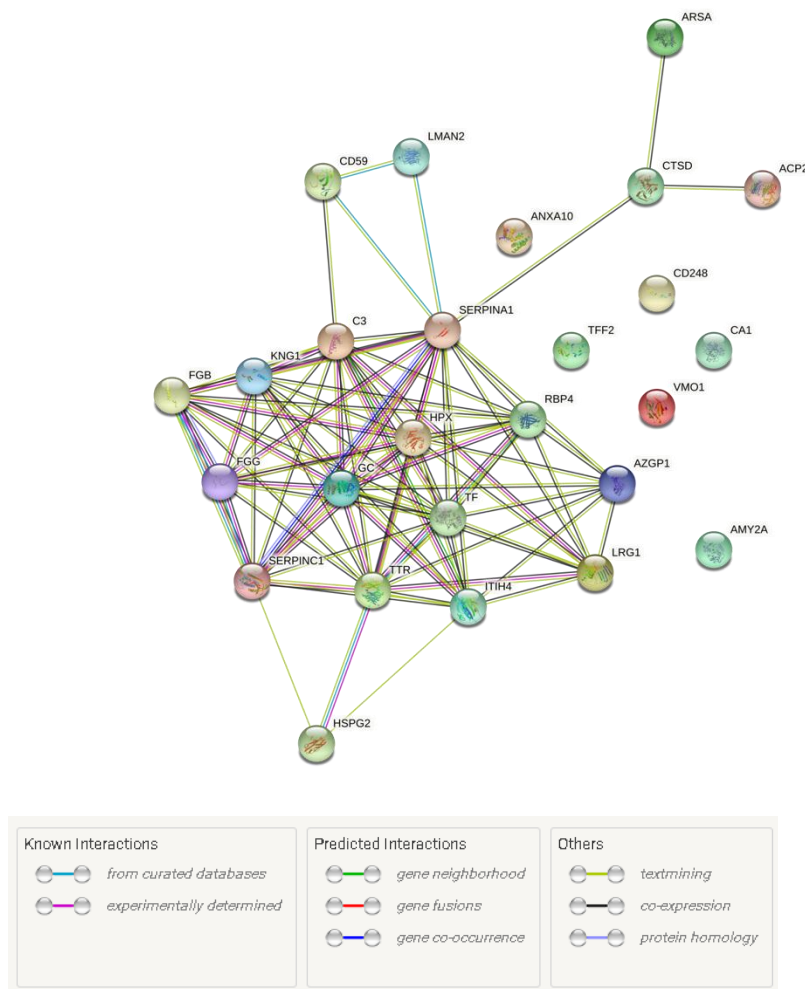

**Supplementary Figure S3.** Original STRING network showing the 26 differential proteins consistently detected in urine of ADHF patients and healthy subjects.

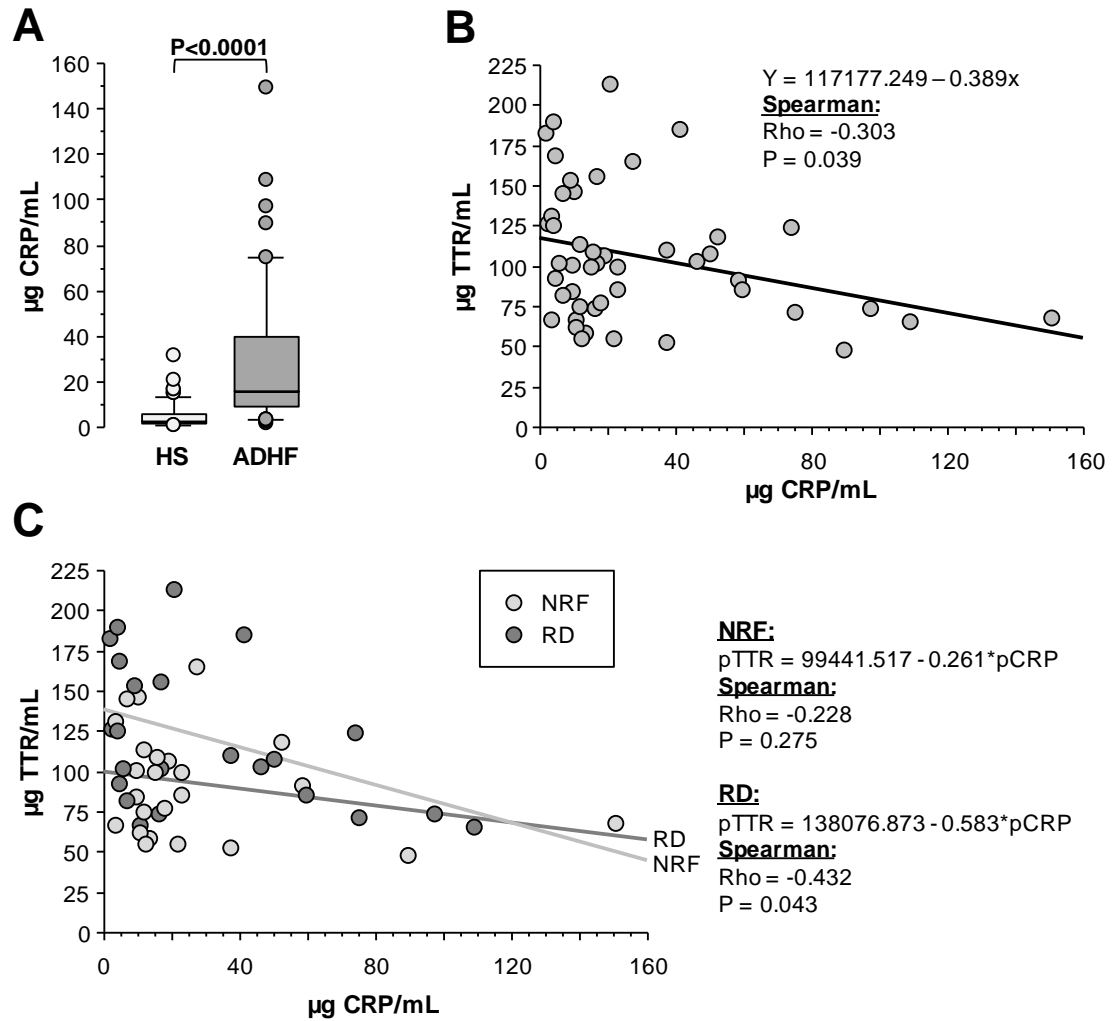

**Supplementary Figure S4.** Plasma C reactive protein (CRP) in ADHF patients at hospital admission. A) CRP levels of ADHF patients (N=67) and healthy subjects (HS). B) Significant correlation between CRP and TTR levels in ADHF patients. C) Regression lines of CRP and TTR correlations depending on kidney function, NRF in light grey and RD with dark grey.
